# Supplementary material for: π-Helix controls activity of oxygen-sensing diguanylate cyclases
Source: PubMed Central journal article supplement (PMC7033309; doi:10.1042/bsr20193602), 2020-02-20
Supplement: BSR-2019-3602_supp.pdf [file BSR-2019-3602_supp.pdf]

## **Supplemental Data**

### **$\pi$ -Helix Controls Activity of Oxygen-Sensing Diguanylate Cyclases**

Johnnie A. Walker, Yuqi Wu, Jacob R. Potter, and Emily E. Weinert

**Table S1.** Crosslinked peptides identified by SIM-XL analysis. Red indicates crosslinked residues.

***BpeGReg Tetramer.*** Numbering based on native protein sequence.

| AA1 | AA2 | Peptide 1              | Peptide 2               |
|-----|-----|------------------------|-------------------------|
| 129 | 216 | RICELLDRDASLSAAQAAATCR | KSEFGLWFIHKAAHAFEGAAESR |
| 129 | 226 | RICELLDRDASLSAAQAAATCR | KSEFGLWFIHKAAHAFEGAAESR |

***PccGCS Tetramer.*** Numbering based on native protein sequence.

| AA1 | AA2 | Peptide 1                    | Peptide 2                                |
|-----|-----|------------------------------|------------------------------------------|
| 45  | 411 | AISEQK                       | LRKKIQDHPIHLQNGESITMTISAGIAVYSGHPDYECLIK |
| 45  | 412 | AISEQK                       | LRKKIQDHPIHLQNGESITMTISAGIAVYSGHPDYECLIK |
| 107 | 213 | WIADILTNTGEHLVDLINHQKIGQIHAR | QNASLLNWENAFIFSVATGTPLSSIQLSDSEFGLWFNHK  |
| 107 | 221 | WIADILTNTGEHLVDLINHQKIGQIHAR | QNASLLNWENAFIFSVATGTPLSSIQLSDSEFGLWFNHK  |
| 107 | 222 | WIADILTNTGEHLVDLINHQKIGQIHAR | QNASLLNWENAFIFSVATGTPLSSIQLSDSEFGLWFNHK  |

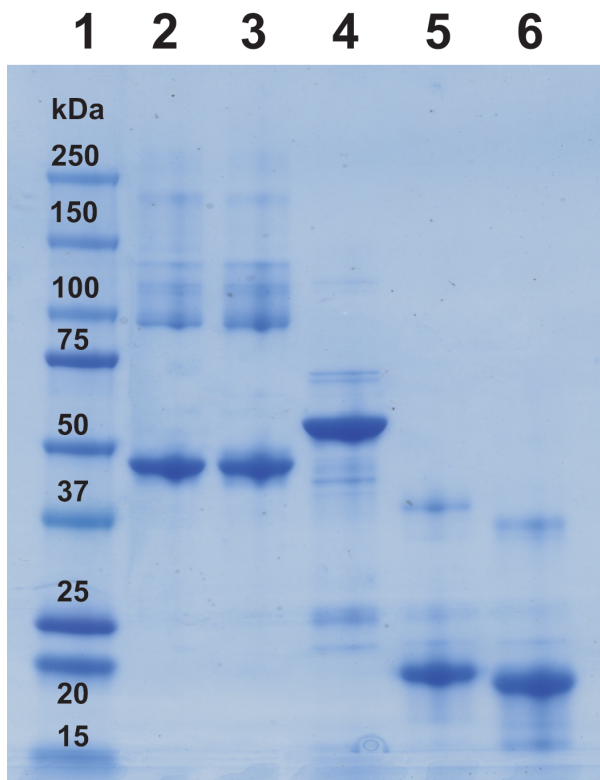

**Figure S1.** Purified protein constructs ran on a Bio-Rad 4-20% Criterion gel. Lane 1, Bio-Rad Precision Plus Kaleidoscope Protein Standards; Lane 2, *PccGCS* WT (55 kDa); lane 3, *PccGCS* H237A/K238A (55 kDa); lane 4, MBP-*PccDGC* (64 kDa); lane 5, *PccGlobin* (22 kDa); lane 6, *BpeGlobin* (19 kDa).

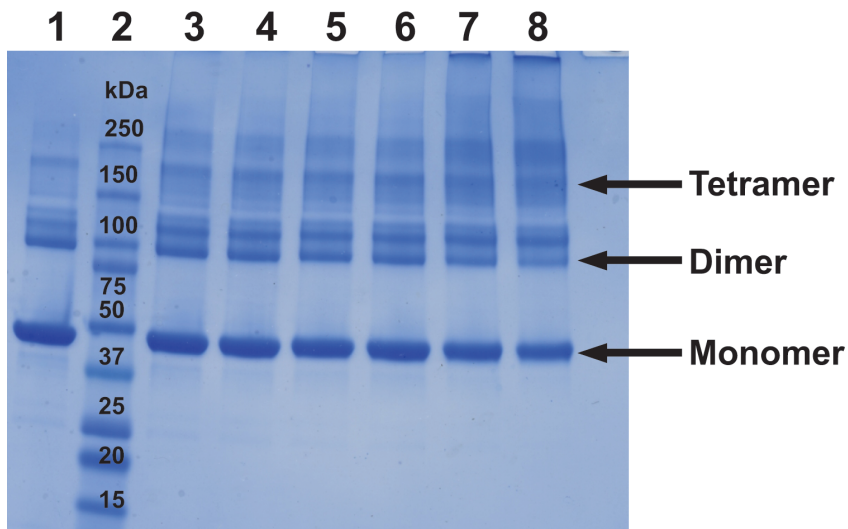

**Figure S2.** Example of a crosslinking polyacrylamide gel with *PccGCS* WT. Lane 1, *PccGCS* WT without crosslinker; lane 2, Bio-Rad Precision Plus Kaleidoscope Protein Standards; lanes 3 and 4, *PccGCS* WT with 2.5X BS3 crosslinker; lanes 5 and 6, *PccGCS* WT with 5X BS3 crosslinker; lanes 7 and 8, *PccGCS* WT with 20X BS3 crosslinker. This experiment was ran on a Bio-Rad 4-20% Criterion gel.

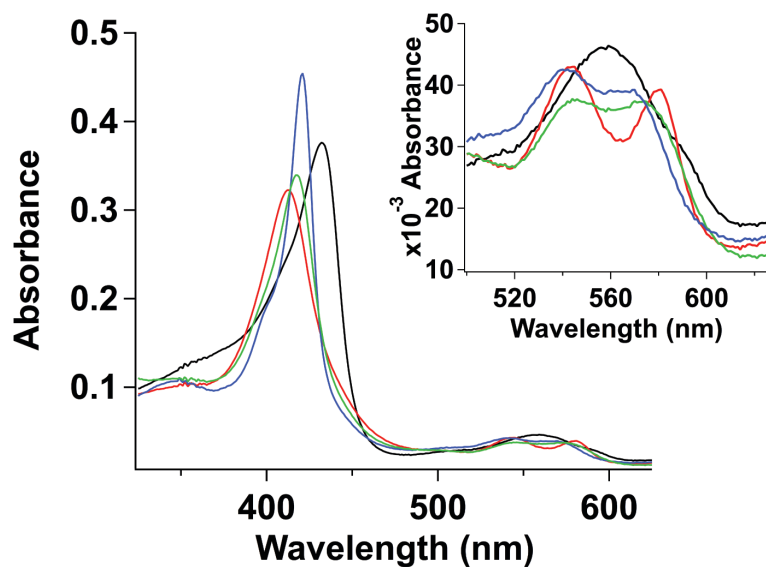

**Figure S3.** Ultraviolet-visible absorption spectra of *PccGCS* H237A/K238A. Red, Fe(II)-O<sub>2</sub>; green, Fe(II)-NO; blue, Fe(II)-CO; black, Fe(II) unligated.

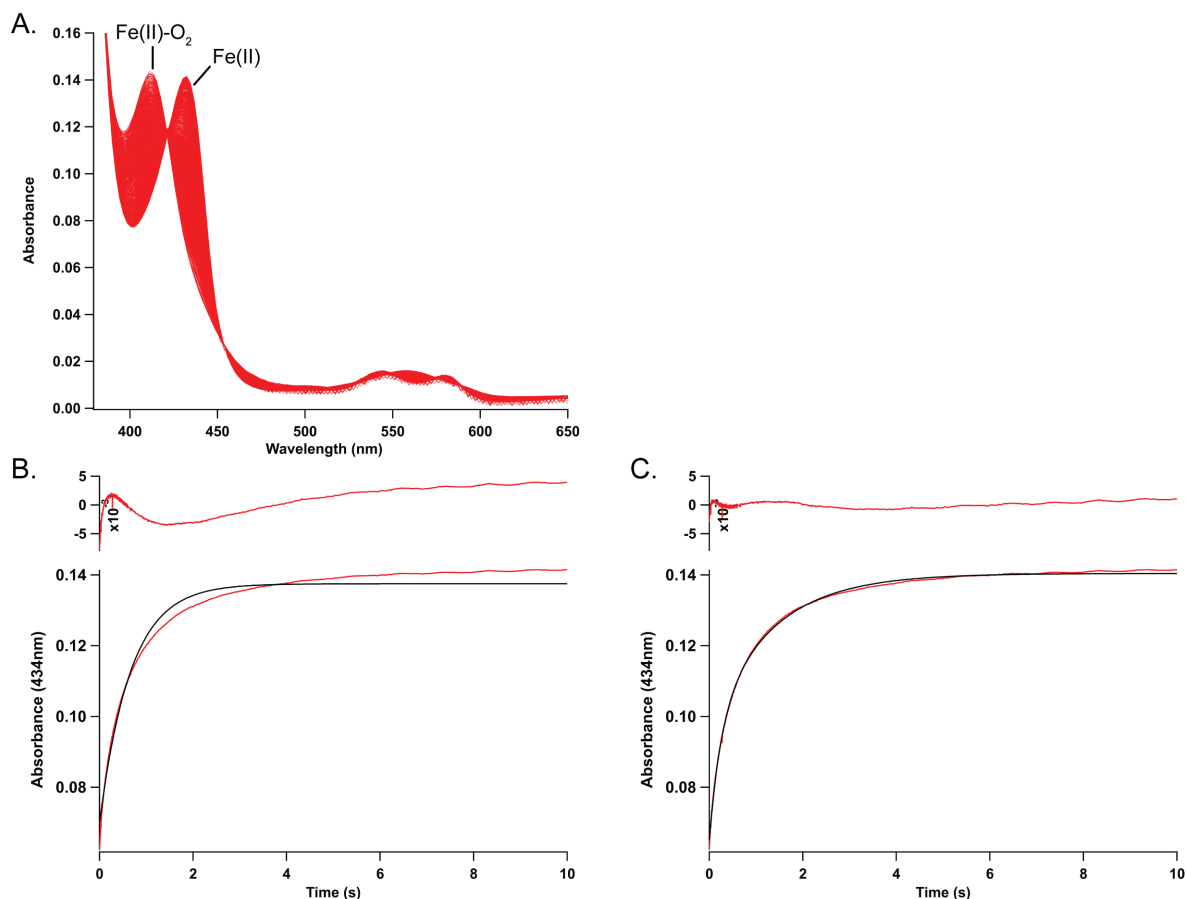

**Figure S4.** Representative stopped flow spectra and fits from an O<sub>2</sub> dissociation experiment of the  $\pi$ -helix double mutant. A) Representative stopped flow spectra for O<sub>2</sub> dissociation from *PccGCS* Fe(II)-O<sub>2</sub> H237A/K238A. (B) Raw data (red) and single

exponential fit (black) for *PccGCS* Fell-O<sub>2</sub> H237A/K238A. Residuals (difference between actual data and fit) are shown in red above the plot. (C) Raw data (red) and double exponential fit (black) for *PccGCS* Fell-O<sub>2</sub> H237A/K238A. Residuals (difference between actual data and fit) are shown in red above the plot.

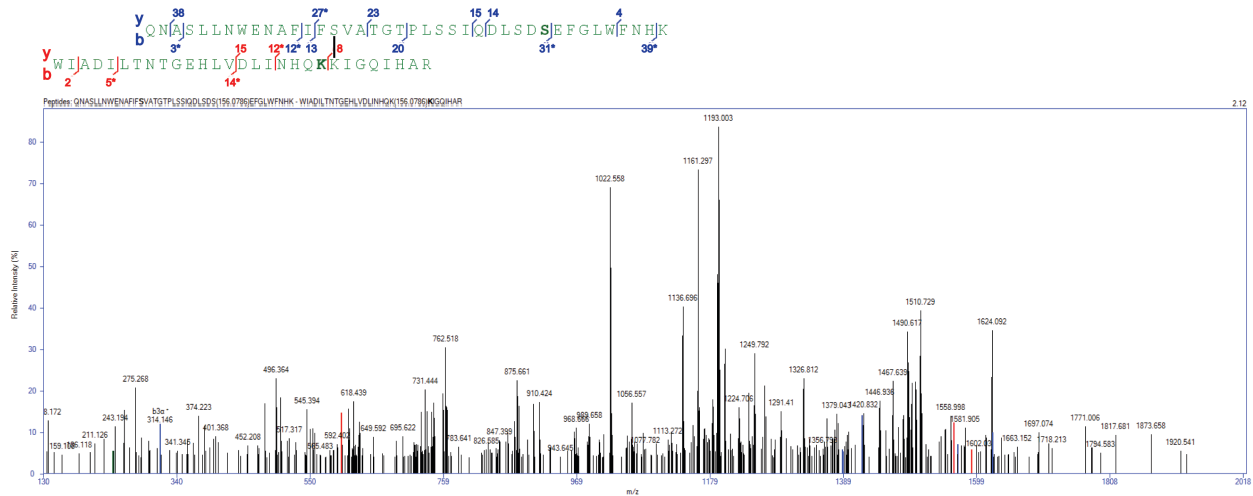

**Figure S5.** Example of high resolution fragmentation spectra of *PccGCS* WT globin domain  $\alpha$ F helix crosslinked with middle domain  $\pi$ -helix. Peaks represent fragmented ions that are annotated in red and blue based on peptides involved in crosslink, and y (C-terminal fragment) and b (N-terminal fragment) ions show where peptide backbone was broken. “ \* ” indicates fragmented ion peak is found in spectra shown.

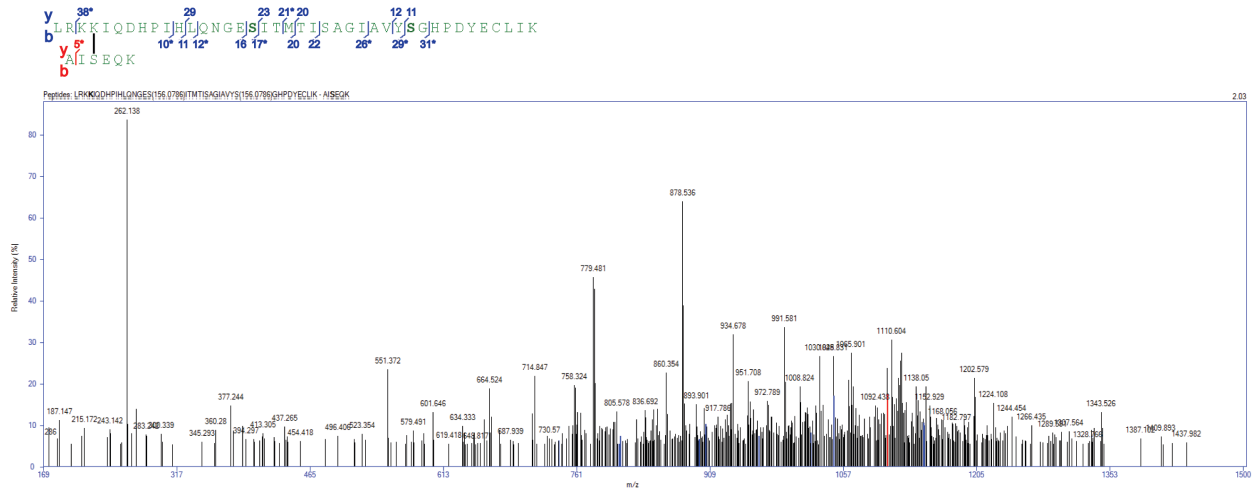

**Figure S6.** Example of high resolution fragmentation spectra of *PccGCS* WT globin domain helix  $\alpha$ B crosslinked with DGC domain helix  $\alpha$ D. Peaks represent fragmented ions that are annotated in red and blue based on peptides involved in crosslink, and y (C-terminal fragment) and b (N-terminal fragment) ions show where peptide backbone was broken. “ \* ” indicates fragmented ion peak is found in spectra shown.

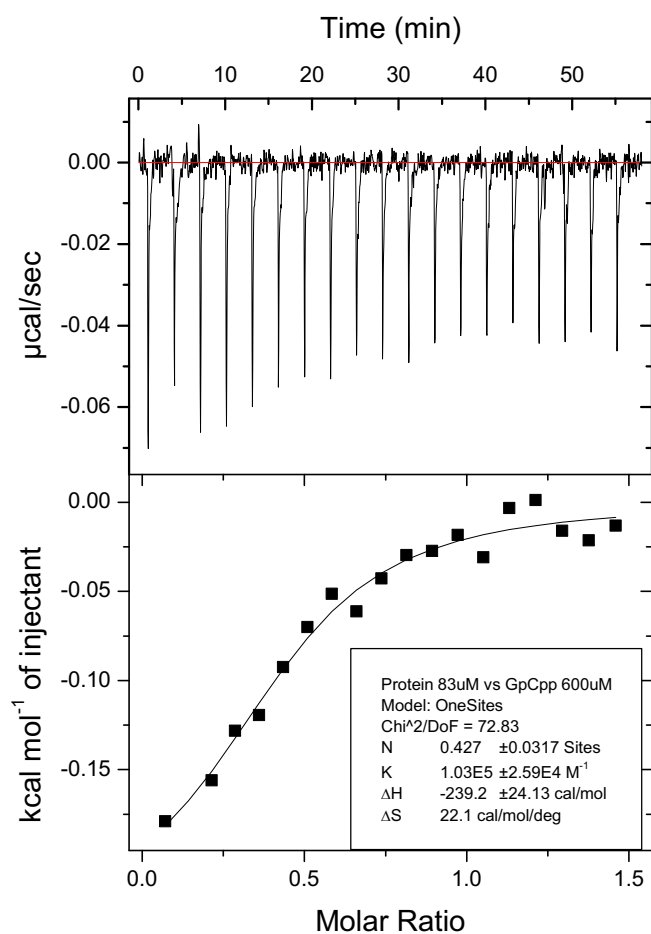

**Figure S7.** ITC titration of *PccGCS* H237A/K238A binding to guanosine-5'-( $\alpha$ -thio)-triphosphate, sodium salt (GpCpp). Binding is reported as  $K_a = 1.03 \times 10^5 \text{ M}^{-1}$ ; the  $K_d$  (calculated as the inverse of  $K_a$ ) = 9.7  $\mu\text{M}$ .

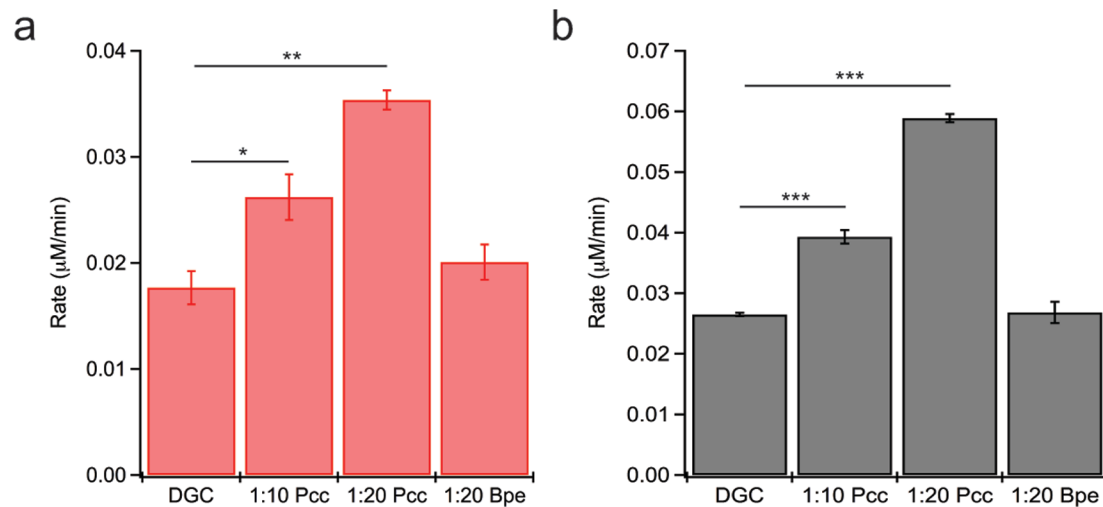

**Figure S8.** Isolated diguanylate cyclase activity in the presence of isolated globin domains. **(a)** Aerobic kinetic rates of MBP-*Pcc*DGC with and without isolated *Pcc*Globin and *Bpe*Globin. **(b)** Anaerobic kinetic rates of MBP-*Pcc*DGC with and without isolated *Pcc*Globin and *Bpe*Globin. DGC – 2.83/3.18 μM MBP-*Pcc*DGC (Fe(II)-O<sub>2</sub> and Fe(II), respectively) / no globin; 1:10 Pcc - 2.83/3.18 μM MBP-*Pcc*DGC (Fe(II)-O<sub>2</sub> and Fe(II), respectively) / 30 μM *Pcc*Globin; 1:20 Pcc - 2.83/3.18 μM MBP-*Pcc*DGC (Fe(II)-O<sub>2</sub> and Fe(II), respectively) / 60 μM *Pcc*Globin; 1:20 Bpe - 2.83/3.18 μM MBP-*Pcc*DGC (Fe(II)-O<sub>2</sub> and Fe(II), respectively) / 60 μM *Bpe*Globin. Reactions were performed in triplicate. Error bars represent standard deviations (\*, P = 0.0052; \*\*, P = 0.0001; and \*\*\*, P < 0.0001).
